# Supplementary material
Source: PubMed Central journal article supplement (PMC5490661)

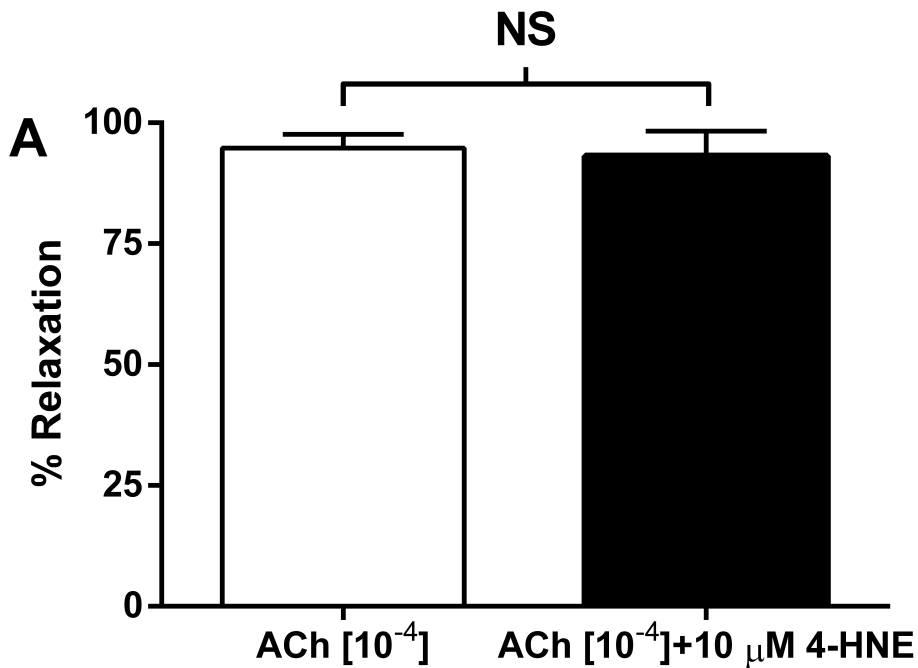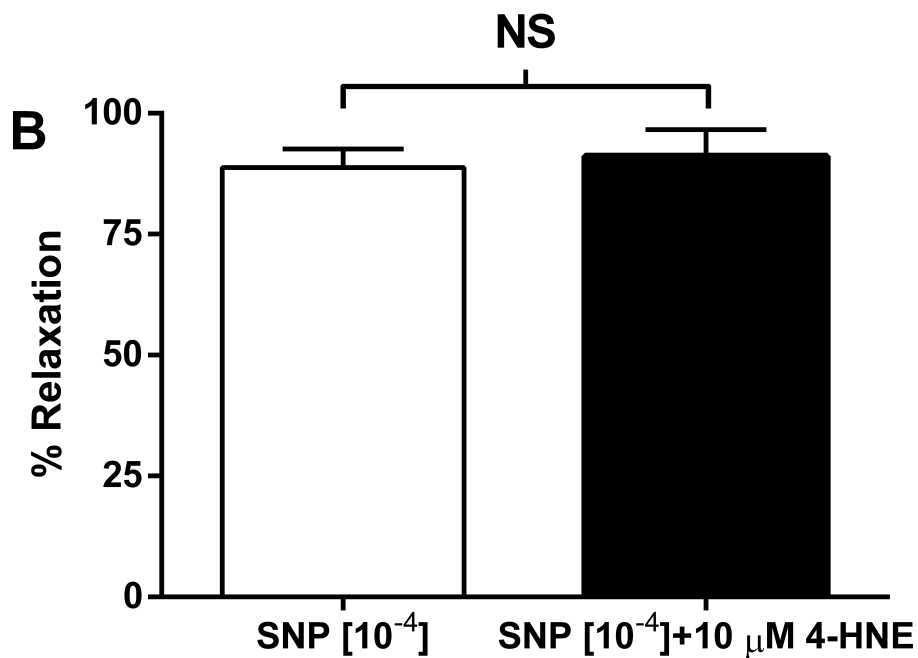

Supplement: NIHMS863383-supplement-Supplemental_files.pdf [file NIHMS863383-supplement-Supplemental_files.pdf]
